# Supplementary material for: Safety and Efficacy of Fimasartan in Patients with Arterial Hypertension (Safe-KanArb Study)
Source: Springer Nature journal article supplement (doi:10.1007/s40256-013-0004-9), 2013-01-23
Supplement: MOESM1 [file 24107538]

*American Journal of Cardiovascular Drugs*

**Safety and Efficacy of Fimasartan in  
Patients with Arterial Hypertension  
(Safe-KanArb Study)**

**An Open-Label Observational Study**

*Jeong Bae Park, Ki-Chul Sung, Seok-Min Kang and Eun Joo Cho*

Corresponding author:

Jeong Bae Park, MD, PhD,

Professor, Department of Medicine/Cardiology,

Cheil General Hospital, Kwandong University College of Medicine

1-19 Mukjung-dong, Jung-ku, Seoul, 100-380 Korea

E-mail: mdparkjb@gmail.com

---

**Electronic Supplementary Material**

| Name            | Clinic                                    |
|-----------------|-------------------------------------------|
| GIL UK HYUN     | SUNGMOGIL INTERNAL MEDICINE CLINIC        |
| RHIM PIL SOO    | RHIM'S INTERNAL MEDICINE CLINIC           |
| SHIN HYEON MIN  | WOORIDLE INTERNAL MEDICINE CLINIC         |
| RHO SOON TAE    | RHO'S INTERNAL MEDICINE CLINIC            |
| LEE SANG WUN    | DR. LEE'S INTERNAL MEDICINE CLINIC        |
| KIM IL JOONG    | KIM ILJOONG INTERNAL MEDICINE             |
| KANG JI HO      | ST.MARY'S BON MEDICAL CLINIC              |
| OH HYUN SOOK    | OH HYUNSOOK INTERNAL MEDICINE             |
| HAN SEUNG SEOK  | SAMSUNG HAN INTERNAL MEDICINE             |
| KIM YUN HONG    | KIM HONG INTERNAL MEDICINE                |
| AHN JAN GHUN    | AHN JANGHUN INTERNAL MEDICINE             |
| JUNG NAE IN     | JUNG NAEIN INTERNAL MEDICINE              |
| SON HONG JU     | SON HONGJU INTERNAL MEDICINE              |
| KIM JU HYOUNG   | MYOUNG SUNG INTERNAL MEDICINE             |
| KIM SUN TAE     | KIM SUNTAE INTERNAL MEDICINE              |
| LEE GYEONG SANG | LEE GYEONGSANG INTERNAL MEDICINE          |
| JO BYUN GKWAN   | VOM INTERNAL MEDICINE                     |
| KIM HONG YUL    | DR. KIM'S MEDICAL AND HEMODIALYSIS CLINIC |
| LEE JONG GU     | LEE JONGGU INTERNAL MEDICINE              |
| KIM GYEONG HUI  | SEYEON INTERNAL MEDICINE                  |
| JO SEUNG HYEON  | YONSEI G.I INTERNAL MEDICINE              |
| PARK HO GIL     | DR. PARK'S INTERNAL MEDICINE              |
| LEE TAE GYU     | LGT NEURO MEDICAL CENTER                  |
| LEE IN SU       | LEE & MOON INTERNAL MEDICINE              |
| SON JANG MYEONG | YEOKSAM SUNGMO INTERNAL MEDICINE          |
| AHN SANG JIK    | AHN'S MEDICAL CLINIC                      |
| CHOI JAE CHUL   | CHOI JAECHUL INTERNAL MEDICINE            |
| HAN KYUNG IL    | SEOUL MEDICAL CLINIC                      |
| LEE KWAN WOO    | LEE KWANWOO INTERNAL MEDICINE             |
| RYU KWANG HYUN  | SAMSUNG WOORI INTERNAL MEDICINE           |
| KYUNG KWAE SOO  | GAEPO INTERNAL MEDICINE                   |
| PARK YONG JUN   | GLOBALCARE INTERNAL MEDICINE              |
| KUK HIANG       | DR.KUK'S INTERNAL MEDICINE                |
| KIM YUK         | SEO MUN INTERNAL MEDICINE                 |
| YOO JEONG SU    | SEOUL YEOLLIN INTERNAL MEDICINE           |
| KO SEONG WON    | DR. KO'S INTERNAL MEDICINE                |
| YANG SEOK WON   | DR. YANG'S INTERNAL MEDICINE              |
| KIM JA CHEON    | SE MYUNG INTERNAL MEDICINE                |
| AHN HONG JUN    | DR. AHN'S INTERNAL MEDICINE               |
| LEE HO CHAE     | DR. LEE HOCHAE INTERNAL MEDICINE          |
| KANG HO GYEONG  | DR. KANG'S INTERNAL MEDICINE              |
| LEE WOON WOO    | LEE WOON WOO INTERNAL MEDICINE            |
| YOO GWANGSU     | DR. YOO'S INTERNAL MEDICINE               |
| KIM KIWOO       | KIM'S MEDICAL CLINIC                      |
| SEO DAE WON     | SEO'S MEDICAL CLINIC                      |
| LEE CHEOL RYONG | CHARM MEDICAL CLINIC                      |
| LEE CHANG HUN   | CHANG-HUN, LEE INTERNAL MEDICINE CLINIC   |

|                  |                                            |
|------------------|--------------------------------------------|
| KONG HEE SANG    | KONG'S MEDICAL CLINIC                      |
| YOUN SEOK JUNG   | SEOK-JUNG, YOUN I.M CLINIC                 |
| CHOI WON JUN     | CHOI WON-JUN, I.M CLINIC                   |
| SHIN DONG HO     | DR. SHIN'S MEDIACL CLINIC                  |
| PARK SHIN SUNG   | SHIN-SUNG, PARK INTERNAL MEDICINE CLINIC   |
| KWON OH HOON     | HANSOL HOSPITAL, DEPARTMENT OF CARDIOLOGY  |
| SOHN KYUNG HWAN  | SOHN INTERNAL MEDICINE                     |
| CHA KYUNG SUK    | CHA INTERNAL MEDICINE CLINIC               |
| KWON GYO SEON    | KWON INT.MEDICINE                          |
| WON SOO YEON     | HANSOL INTERNAL MEDICINE CLINIC            |
| KO GEUN AH       | KO INTERNAL MEDICINE CLINIC                |
| CHEON KI WON     | CHEON MEDICAL CLINIC                       |
| KANG MIN MO      | KANG MIN MO INTERNAL MEDICINE CLINIC       |
| LEE JUN SANG     | LEE JUN SANG MEDICAL CLINIC                |
| JUNG HYUNG JIN   | JUNG HYUNG JIN INTERNAL MEDICINE CLINIC    |
| MOK CHA SOO      | DR. MOK'S INTERNAL MEDICINE CLINIC         |
| CHUNG IN SUNG    | CHUNG IN SUNG INTERNAL MEDICINE CLINIC     |
| KIM YONG BUM     | CHAMSARANG MED. CLINIC                     |
| KIM SANG GON     | KIM SANG GON INTERNAL MEDICINE CLINIC      |
| DOO YOUNG CHEOUL | DR. DOO'S CARDIAC CLINIC                   |
| JANG DONG SEOK   | DR. JANG'S INTERNAL MEDICINE CLINIC        |
| KIM SYN EUNG     | KIM, SINN EUNG INTERNAL MEDICINE           |
| SUH JOONG SAN    | SUH JOONG SAN INTERNAL MEDICINE CLINIC     |
| LEE KWANG SEOB   | DR.LEE CLINIC INTERNAL MEDICINE&PEDIATRICS |
| KIM JONG WOONG   | KIM JONG WOONG INTERNAL MEDICINE CLINIC    |
| SHIN SUNG TAE    | SHINSUNG MEDICAL CLINIC                    |
| PARK WOO SANG    | PARKSANG INTERNAL MEDICINE CLINIC          |
| JANG MI YOUNG    | JANG, MI YOUNG INTERNAL MEDICINE           |
| PARK IL KWON     | SEOUL WOORIDUL INTERNAL MEDICINE CLINIC    |
| OH HEUNG YOUNG   | DUKJE MEDICA CLINIC                        |
| PARK CHEOL HO    | PARK'S MEDICAL CLINIC                      |
| JUN HO CHOON     | JUN HO CHOON I.M. CLINIC                   |
| CHOI NAM HO      | SEOUL INTERNAL MEDICINE CLINIC             |
| KIM MYUNG JIN    | KIM MYUNGJIN INTERNAL MEDICINE             |
| HONG JONG SEO    | HONGJONGSEO INTERNAL MEDICINE              |
| KANG WON SEOK    | KANG WON SEOK INTERNAL MEDICINE            |
| BAE YONG PYO     | BAE YONGPYO INTERNAL MEDICINE              |
| KIM SUNG SIK     | KIM SUNGSIK INTERNAL MEDICINE              |
| CHOI JIN         | CHOI JIN INTERNAL MEDICINE                 |
| KIM YOUNG JAE    | KIM YOUNGJAE INTERNAL MEDICINE             |
| CHO CHEON YOUNG  | CHO CHEONYOUNG INTERNAL MEDICINE           |
| YU HYE SIN       | YU'S INTERNAL MEDICINE CLINIC              |
| YOO TAEK JOONG   | YOO TAEKJOONG INTERNAL MEDICINE            |
| LEE SOO HYUN     | LEE SOOHYUN INTERNAL MEDICINE              |
| JU YONG JIN      | JU YONGJIN INTERNAL MEDICINE               |
| KWON DONGWON     | HAN WOORI INTERNAL MEDICINE                |
| LEE NAE SUK      | LEE NAESUK INTERNAL MEDICINE               |
| YOON MYUNG JIN   | YOON MYUNGJIN INTERNAL MEDICINE            |
| CHOI JIN         | CHOI JIN INTERNAL MEDICINE                 |

|                  |                                   |
|------------------|-----------------------------------|
| LEE YOUNG GIL    | DR. LEE'S INTERNAL MEDICINE       |
| LEE BYEONG CHEOL | LEE BYEONGCHEOL INTERNAL MEDICINE |
| JOO YOO CHEOL    | SUNGSIM INTERNAL MEDICINE         |
| YOON YUNG KEUN   | YOON YUNG KEUN INTERNAL MEDICINE  |
| HEO SUNG OUK     | HEO'S INTERNAL MEDICINE           |
| KWON YONG MAN    | DR. KWON'S INTERNAL MEDICINE      |
| CHOI GANG SIK    | CHOI KANG SIK INTERNAL MEDICINE   |
| JEUNG HYUNG KEUN | JEUNG HYUNGKEUN INTERNAL MEDICINE |
| LEE JI HYUN      | DR. LEE'S INTERNAL MEDICINE       |
| PARK JONG EUN    | PARK JONGEUN INTERNAL MEDICINE    |
| HONG YO HAN      | HONG YOHAN INTERNAL MEDICINE      |
| CHOI MIN JUN     | CHOI MINJUN INTERNAL MEDICINE     |
| KIM HYO SEOK     | KIM HYOSEOK INTERNAL MEDICINE     |
| LEE SANG GOO     | LEE SANGGOO INTERNAL MEDICINE     |
| KIM YOUNG HWAN   | KIM YOUNG HWAN IM                 |
| KANG CHANG WON   | KANG CHANG WON INTERNAL MEDICINE  |
| KIM WOO YO       | KIM WOO YO IM                     |
| RYU JONG SANG    | RYU JONG SANG INTERNAL MEDICINE   |
| HONG SEOK HO     | HONG SEOK HO INTERNAL MEDICINE    |
| PARK SOO JIN     | YEON SEI PARK INTERNAL MEDICINE   |
| CHAE JONG KOO    | CHAE INTERNAL MEDICINE            |
| HAN SEUNG HEE    | YEON WOO INTERNAL MEDICINE        |
| LEE DONG SOO     | LEE DONG SOO                      |
| LEE JONG KYUNG   | LEE JONG KYUNG INTERNAL MEDICINE  |
| LEE KYUNG SOO    | SEOUL SAMSUNG INTERNAL MEDICINE   |
| KIM HYEON SOO    | YEIL SUNG MO INTERNAL MEDICINE    |
| HWNG JOO HO      | JO EUN INTERNAL MEDICINE          |
| KIM HEE SEOP     | SEOUL BON INTERNAL MEDICINE       |
| LEE WOOK YONG    | LEE INTERNAL MEDICINE             |
| PARK TAE EUNG    | PARK TAE EUNG INTERNAL MEDICINE   |
| PARK JOO IL      | HAN BIT INTERNAL MEDICINE         |
| CHOI SEUNG JOON  | CHOI INTERNAL MEDICINE            |
| LEE HO SHIM      | LEE HO SHIM INTERNAL MEDICINE     |
| LEE MYUNG YEOL   | MYUNG INTERNAL MEDICINE           |
| SONG MIN SEOP    | SEOUL SONG INTERNAL MEDICINE      |
| YOON CHANG OK    | YOON CHANG OK INTERNAL MEDICINE   |
| KIM JAE HAK      | KIM JAE HAK IM                    |
| KIM DONG SEOP    | KIM DONG SEOP IM                  |
| SHIN JOONG HO    | SHIN JOONG HO INTERNAL MEDICINE   |
| BANG IK SOO      | BANG IK SOO INTERNAL MEDICINE     |
| SUN WANG JU      | SUN WANG JU I.M CLINIC            |
| AHN TAE SOO      | AHN TAE SOO I.M CLINIC            |
| JANG SANG HO     | YONSEI MEDICAL CLINIC             |
| CHUNG KI SOO     | CHUNG'S I.M CLINIC                |
| SHIN MIN HO      | SHIN MIN HO I.M CLINIC            |
| KWON KANG HO     | KWON' MEDICAL CLINIC              |
| KIM TAE SUN      | TS I.M CLINIC                     |
| SIN WON SIK      | WELLTON MEDICAL CENTER            |
| KIM YOUNG JIN    | KIM YOUNG IM CLINIC               |

|                  |                                             |
|------------------|---------------------------------------------|
| JEUNG KYUNG HEON | JEUNG'S I.M CLINIC                          |
| LEE JONG YONG    | YALE MEDICAL CLINIC                         |
| BANG JOON KYUNG  | DR. BANG'S CARDIOLOGY CLINIC                |
| CHUN SANG BAE    | CHUN I.M CLINIC                             |
| KIM JUNG BAEK    | KIM JUNG BAEK I.M CLINIC                    |
| CHO HO JUN       | J INTERNAL MEDICINE                         |
| YOON YONG KWANG  | YOON YONGKWANG INTERNAL MEDICINE            |
| KIM TAE GYUN     | BORAM ST. MARY'S INTERNAL MEDICINE          |
| LEE WON PYO      | DR LEE'S CLINIC                             |
| CHUN DAE CHUL    | DR CHUN'S MEDICAL CLINIC                    |
| KIM JAE MYEON    | DR KIM'S CLINIC                             |
| KIM HAK SAN      | YONSEI MEDICAL CLINIC                       |
| LEE YOUNG KU     | DR. LEE'S INTERNAL MEDICINE CLINIC          |
| RHO YOUNG HO     | DR. RHO'S INTERNAL MEDICINE CLINIC          |
| KIM CHUNG MOOK   | KIM CHUNGMOOK INTERNAL MEDICINE             |
| MOON CHEOL       | MOON CHEOL INTERNAL MEDICINE                |
| KIM YOUNG HWAN   | KIM YOUNGHWAN INTERNAL MEDICINE             |
| SHIM SEONG CHUN  | SHIM SEONGCHUN INTERNAL MEDICINE            |
| KIM JUNG GI      | KIM JUNG GI INTERNAL MEDICINE               |
| KIM YE WON       | KIM YE WON INTERNAL MEDICINE                |
| KIM JONG YUL     | KIM JONGYUL INTERNAL MEDICINE               |
| LEE SANG BAE     | LEE SANGBAE INTERNAL MEDICINE               |
| CHOI JIN WOOK    | CHOI JIN WOOK INTERNAL MEDICINE             |
| LEE KYUNG MI     | YOENSEI MEDICAL CLINIC                      |
| KIM JAE PIL      | PIL MEDICAL CLINIC                          |
| PARK JAEK YOUNG  | SEOUL BOM INTERNAL MEDICINE CLINIC          |
| YOU YONG KYU     | NAM MOON INTERNAL MEDICINE                  |
| LIM HEE CHUL     | DR.LIM'S INTERNAL MEDICINE                  |
| SUNG SANG KYU    | DR.SUNG'S INTERNAL MEDICINE                 |
| KIM SUNG CHIL    | DR.KIM'S INTERNAL MEDICINE                  |
| CHO JONG GEUN    | DR.CHO'S INTERNAL MEDICINE                  |
| LEE SOO YANG     | LEE SOOYANG INTERNAL MEDICINE               |
| LEE JAE KWANG    | SEOUL INTERNAL MEDICINE CLINIC              |
| KIM HYEON SU     | HAN YANG INTERNAL MEDICINE                  |
| YOU ZIN MOCK     | YOU ZINMOCK MEDICAL CLINIC                  |
| KIM JAE YEON     | KIM JAEYEON IM CLINIC                       |
| LEE MYUNG HEE    | DR. MYUNG'S MEDIACL CLINIC                  |
| JEONG IN KU      | WOORI INTERNAL MEDICINE CLINIC              |
| OH HYUN JU       | OH INTERNAL MEDICINE CLINIC                 |
| CHEON SEON HEE   | MYVILL INTERNAL MEDICINE CLINIC             |
| KONG HYUN HO     | KONG INTERNAL MEDICINE CLINIC               |
| CHOI IN TAE      | CHOI INTAE INTERNAL MEDICINE CLINIC         |
| LIM BYOUNG HUN   | LIM INTERNAL MEDICINE                       |
| KWON JIN IL      | KWON INTERNAL MEDICINE CLINIC               |
| PARK KI HO       | HEART AND DISEASE CLINIC                    |
| LEE BAE JIN      | LEE'S MEDICAL CLINIC                        |
| LYU SEN          | WOORI INTERNAL MEDICINE CLINIC              |
| KIM YONG WOOK    | WELLBEING MAEUMSOK INTERNAL MEDICINE CLINIC |
| KIM YOUNG JUN    | KIMYOUNGJUN IM CLINIC                       |

|                 |                                                |
|-----------------|------------------------------------------------|
| JEONG WON JEA   | WOORIDLE INTERNAL MEDICINE CLINIC              |
| PARK SUNG GON   | YONSEI PARK INTERNAL MEDICINE CLINIC           |
| PARK TAE YONG   | TEARIM INTERNAL MEDICINE CLINIC                |
| KIM HYUNG SIK   | KIM'S IM CLINIC                                |
| PARK DONG KYU   | KOOK'S INTERNAL MEDICINECLINIC                 |
| LEE BUM WOO     | ANYANG MYUNG INTERNAL MEDICINE CLINIC          |
| JEON JIN WOO    | DONGAHN MEDICAL CLINIC                         |
| CHO HAN SU      | MEDIHUE JAEIL INTERNAL MEDICINE                |
| PARK KUN TAEK   | PARK'S CLINIC OF INTERNAL MEDICINE             |
| JUNG JUN KEUN   | DR. JUNG'S MEDICAL CLINIC                      |
| CHUNG WON JONG  | PAIK MEDICAL CLINIC                            |
| CHO YOUNG JUN   | YONSEI CHO INTERNAL MEDICINE CLINIC            |
| LEE CHANG KYUN  | SEOUL INTERNAL MEDICINE CLINIC                 |
| KO WAN          | YOUNSEI PHYSICIAN'S CLINIC(ANSAN)              |
| KIM SUK HUN     | DR. KIM'S INTERNAL MEDICINE CLINIC             |
| JUNG CHUL HUN   | DR. JUNG'S INTERNAL MEDICINE CLINIC            |
| OH DONG HWAN    | DR. OH'S INTERNAL MEDICINE CLINIC              |
| WON WOOK HEE    | 21ST CENTURY CLINIC                            |
| KIM HAN SOO     | 21ST CENTURY MEDICAL CLINIC                    |
| JANG WOO YUNG   | SEOUL CENTRAL INTERNAL MEDICINE CLINIC         |
| JUN CHUL HWAN   | 21ST CENTURY YONSEI CLINIC                     |
| KIM YUNG SOO    | MEDIPARK INTERNAL MEDICINE CLINIC              |
| PARK HYE SUN    | SUN INTERNAL MEDICINE CLINIC                   |
| LEE BYUNG WON   | DR. LEE'S CLINIC OF INTERNAL MEDICINE          |
| PARK SANG JOON  | SAMSUNG INTERNAL MEDICINE CLINIC               |
| SONG HEE GON    | DR SONG'S ASAN MEDICAL CLINIC                  |
| LEE ME HWA      | DR LEE'S CLINIC                                |
| JUNG HO SEOK    | SUJI MEDICORE INTERNAL MEDICINE CLINIC         |
| KIM JIN YEONG   | KIM JIN YEONG MEDICAL CLINIC                   |
| CHOI KI HYUN    | HYUN MEDICAL CLINIC                            |
| HAN DAE HEE     | DR. HAN'S INTERNAL MEDICINE CLINIC             |
| KIM NAM JIN     | DR. JIN'S INTERNAL MEDICINE CLINIC             |
| LEE SANG SU     | SEOUL SAMSUNG INTERNAL MEDICINE CLINIC         |
| KIM PIL HO      | DONGBAEK SAMSUNG INTERNAL MEDICAL CLINIC       |
| HAN SE HWAN     | DR. HAN SE HWAN CLINIC OF INTERNAL MEDICINE    |
| YEO KYEONG GU   | SARANG'S INTERNAL MEDICINE & PEDIATRICS CLINIC |
| HWANG KYUNG HWA | CHAM INTERNAL MEDICINE CLINIC                  |
| JUNG SUNG CHULL | YONSEI SEHYUN INTERNAL MEDICINE CLINIC         |
| LEE SEONG JOO   | LEE SEONG JU INTERNAL MEDICINE CLINIC          |
| BAE HEE DONG    | BAE HEE DONG INTERNAL MEDICINE CLINIC          |
| JEON YONG       | JEON YONG INTERNAL MEDICINE CLINIC             |
| KWON GUN HO     | YONSEI INTERNAL MEDICINE CLINIC                |
| PARK JAE EUN    | SINYEONGTONG SAMSUNG INTERNAL MEDICINE CLINIC  |
| KIM YOUNG JUN   | YONSEI MEDICAL CLINIC                          |
| KWON MI SUN     | DR.KWON'S MEDICAL CLINIC                       |
| CHAE BONG NAM   | DR.CHAE'S MEDICAL CLINIC                       |
| HWANG IN SUB    | DR.HWANG'S MEDICAL CLINIC                      |
| LEE HYANG JOO   | DR.LEE'S MEDICAL CLINIC                        |
| KANG HO KYU     | KANG'S MEDICAL CLINIC                          |

|                  |                                              |
|------------------|----------------------------------------------|
| CHOI SUNG JUN    | SOO WOMENS HOSPITAL                          |
| JEON JAE HOON    | JEON JAE HOON MEDICAL CLINIC                 |
| CHAE SU IN       | WOORIDLE MEDICAL CLINIC                      |
| BANG SOO KWAN    | BANG SOO KWAN MEDICAL CLINIC                 |
| SUH JEONG MIN    | SUH JEONG MIN MEDICAL CLINIC                 |
| JAEOONG PARK     | DR.PARK'S INTERNAL MEDICINE CLINIC           |
| CHOI YUNGUN      | CHOI YUNGUN INTERNAL MEDICAL CLINIC          |
| NAH HO GYUN      | PYEONGTAEK YONSEI INTERNAL MEDICAL CLINIC    |
| PARK KYUN CHUL   | PARK KYUN CHUL MEDICAL CLINIC                |
| KIM YOUNG HEUN   | GI-DOK MEDICAL CLINIC                        |
| NA JUNG IL       | NA JUNG IL MEDICAL CLINIC                    |
| PARK YOUNG JU    | SEOUL MEDICAL CLINIC                         |
| SEO KI JUNG      | OSAN SUNG MO MEDICAL CLINIC                  |
| WOO YOUNG SIK    | SUNGMO PLUS MEDICAL CLINIC                   |
| HONG CHANG KWON  | 21 WOORI CLINIC                              |
| JUNG YEON SIL    | SANMSUNG INTERNAL MEDICINE CLINIC            |
| SUNG GEON HYEONG | HOOSUNG MEDICAL CLINIC                       |
| CHUNG YOUNG HO   | CHUNG YOUNG HO INTERNAL MEDICINE CLINIC      |
| LIM IN-GI        | DR.LIM'S MEDICAL CLINIC                      |
| KIM EUN JU       | JU INTERNAL MEDICINE CLINIC                  |
| LEE SANG JUN     | BLUE MEDICAL CLINIC                          |
| KIM GOO YOUNG    | SEOUL SAMSUNG INTERNAL MEDICINE CLINIC       |
| KIM DONG JOO     | SUWON YONSEI MEDICAL CLINIC                  |
| KIM MI YOUNG     | SUWON JUNGANG INTERNAL MEDICINE CLINIC       |
| LEE HO SOON      | HWA IN INTERNAL MEDICINE CLINIC              |
| PARK YOUNG BOO   | PARK'S INTERNAL MEDICINE CLINIC              |
| HAN KYUNG SOOK   | HANHONG INTERNAL MEDICINE CLINIC             |
| HAN JONG HAK     | HAN JONG HAK INTERNAL MEDICINE CLINIC        |
| CHO JAE SIK      | CHO JAE SIK INTERNAL MEDICINE CLINIC         |
| CHOI SUNG HO     | SUNG HYUN INTERNAL MEDICINE CLINIC           |
| LEE GYU HYUN     | DR.LEE'S INTERNAL MEDICINE CLINIC            |
| KIM KWANG HYUN   | YONSEI MISO INTERNAL MEDICINE CLINIC         |
| SUN YOUNG CHUNG  | HANSARANG INTERNAL MEDICINE CLINIC           |
| HAN. YO SEB      | IL SAN MO DEN INTERNAL MEDICINE CLINIC       |
| YOON GWANG SOO   | WELL BEING INTERNAL MEDICINE CLINIC          |
| JANG JEA JIN     | JANG JEA JIN INTERNAL MEDICINE CLINIC        |
| LIM GYU TAEK     | LIM'S INTERNAL MEDICINE CLINIC               |
| KIM SUNG HEE     | SEOUL I.M CLINIC                             |
| CHOI JIN WON     | HANVIT INTERNAL MEDICINE CLINIC              |
| RYU JAE CHOON    | RYU JAE CHOON INTERNAL MEDICINE&HEART CLINIC |
| BAEK MOON CHUL   | SAMSUNG PYEONHAN INTERNAL MEDICINE           |
| PARK YU JUNG     | DR. PARK'S CLINIC                            |
| NA BYUNG MAN     | NA BYUNG MAN I.M CLINIC                      |
| KIM SANG HUN     | SEOUL SAMSUNG INTERNAL MEDICINE CLINIC       |
| OH SOO CHUL      | YEDAM CLINIC                                 |
| SON HYUN BAE     | MEDIPLUS HOSPITAL                            |
| KIM KI BUM       | KIM KI BUM IM CLINIC                         |
| YOO BYUNG WOO    | NEULPYUNHAN HOSPITAL                         |
| SEO IN SEOK      | HYUNDAE OS                                   |

|                 |                                           |
|-----------------|-------------------------------------------|
| AHN HYUK SOO    | SOK HEPATO-GASTROENTEROLOGY CLINIC CENTER |
| LEE SUNG HEE    | MEDI-YIN HOSPITAL                         |
| LEE SUNG GYE    | LEE GI PYUM MEDICAL CLINIC                |
| HWANG SUNG BO   | GURI HWANG'S MEDICAL CLINIC               |
| CHA JU YOUNG    | DR. CHA'S MEDICAL CLINIC                  |
| YOON KI HEON    | DR. YOON'S MEDICAL CLINIC                 |
| LEE BYUNG SAM   | SEOUL SAMSUNG INTERNAL MEDICINE           |
| OH HUNG SOK     | OH'S INTERNAL MEDICINE                    |
| HONG SUNG CHUL  | HONG'S MEDICAL CLINIC                     |
| CHOO KIL YEON   | DR. CHOO'S MEDICAL CLINIC                 |
| NAM YEONG JIN   | JIN CLINIC                                |
| LEE MYUNG KI    | LEE MYUNG KI INTERNAL MEDICINE            |
| KIM JEONG GYUN  | HYUNDAE ASAN INTERNAL MEDICINE            |
| KWON O YUN      | KWON O YUN INTERNAL MEDICINE              |
| LEE KANG SEOK   | LEE KANG SEOK INTERNAL MEDICINE           |
| AHN JONG HOON   | DR.AHN'S INTERNAL MEDICINE                |
| JOO HYUN JUNG   | JOO & HAN INTERNAL MEDICINE               |
| PACK CHAN YOUNG | SAMSUNG SAINT INTERNAL MEDICINE           |
| KANG NAM YONG   | KANG'S CLINIC                             |
| LEE CHUNG KYU   | WOORI MEDICAL CLINIC                      |
| KIM YOUNG HACK  | HANSARANG INTERNAL MEDICINE               |
| BAE CHANG HWANG | HO PYEONG ASAN INTERNAL MEDICINE          |
| KIM KYUNG UK    | KIM KYUNG UK IM                           |
| PYUN JUN CHUL   | WOORI INTERNAL MEDICINE                   |
| KIM UI KYUNG    | JOONGANG INTERNAL MEDICINE                |
| SHIM SEUNG SIK  | SHIM'S INTERNAL MEDICINE                  |
| BAN JONG HO     | BAN'S MEDICAL CLINIC                      |
| KWON HAK JUNG   | YIM INTERNAL MEDICINE CLINIC              |
| YANG YOUNG PYO  | YANG YOUNG PYO INTERNAL MEDICINE CLINIC   |
| SHIN HYUN SEUNG | SHIN HYUN SEUNG INTERNAL MEDICINE CLINIC  |
| MOON JEONG SIK  | MOON JEONG SIK INTERNAL MEDICINE CLINIC   |
| HONG KWANG IL   | HI-Q HONG INTERNAL MEDICINE CLINIC        |
| KWAK HYUN SHEOL | HYUN INTERNAL MEDICINE CLINIC             |
| SONG TAI JIN    | SONG INTERNAL MEDICINE CLINIC             |
| KIM HYUN OK     | WOORI INTERNAL MEDICINE CLINIC            |
| YOO SUK HWAN    | YOOSUKHWAN INTERNAL MEDICINE              |
| LEE CHANG SON   | YALE INTERNAL MEDICAL CLINIC              |
| HA HEON DON     | HA HEON DON INTERNAL MEDICAL CLINIC       |
| YUN HYUNG SEON  | GYEYANG SOK INTERNAL MEDICINE CLINIC      |
| KIM CHUL        | KIM CHUL INTERNAL MEDICINE                |
| IM DO YOON      | HAPPY INTERNAL MEDICINE                   |
| HONG JIN SEON   | INCHEON BEST CLINIC                       |
| PARK BYUNG DO   | PARK BYUNG DO INTERNAL MEDICINE           |
| JUNG HYEOK SANG | FRESH SOK INTERNAL MEDICINE               |
| AHN DAE HYUN    | LOVE INTERNAL MEDICINE                    |
| BONGHYUNGGEON   | BONGHYUNGGEON INTERNAL MEDICINE           |
| KANG MOON HO    | KANGMOONHO INTERNAL MEDICINE              |
| YU SUNG TAE     | HALLYM INTERNAL MEDICINE                  |
| CHO YO HAN      | YONSEI JO INTERNAL MEDICINE               |



|                 |                                      |
|-----------------|--------------------------------------|
| PARK HYUN CHUL  | INCHEON SOK INTERNAL MEDICINE CLINIC |
| PARK SANG HYUN  | PARKSANGHYUN INTERNAL MEDICINE       |
| LEE GI SUB      | LEEGISUB INTERNAL MEDICINE           |
| CHOI TAE RYUL   | CHOITAERYUL INTERNAL MEDICINE        |
| NAM GUI HYUN    | HAMCHUN INTERNAL MEDICINE            |
| LEE EUN SANG    | CHAMJOEUN INTERNAL MEDICINE          |
| KIM SUNG CHUL   | KIMSUNGCHUL INTERNAL MEDICINE        |
| KIM IN HO       | KIMINHO INTERNAL MEDICINE            |
| KIM BANG SU     | KIMBANGSU INTERNAL MEDICINE          |
| LEE SOO GUEM    | LEESOOGUEM INTERNAL MEDICINE         |
| KANG DAE SONG   | KANG INTERNAL MEDICINE               |
| PARK HO SUNG    | PARK INTERNAL MEDICINE               |
| BYUN HEUNGRYUL  | BYUN INTERNAL MEDICINE               |
| MOON DOO SUB    | NEWLIFE INTERNAL MEDICINE            |
| KIM SOO KYUNG   | HANSOL INTERNAL MEDICINE             |
| YOOK EUN JU     | BUBU INTERNAL MEDICINE               |
| LIM BYUNG WOOK  | DR,LIM'S INTERNAL MEDICINE CLINIC    |
| RYU SUNG TAE    | BOOCHUNSOK INTERNAL MEDICINE         |
| PARK JI WON     | BUCHEON ST.MEDI INTERNAL MEDICINE    |
| SEO CHAN JONG   | KN SARANG MEDICAL CLINIC             |
| MOON BYUNGSIK   | MOON INTERNAL MEDICINE               |
| JUN SUNG HEE    | JUN SUNGHEE INTERNAL MEDICINE        |
| PARK SOO JE     | SOMANG INTERNAL MEDICINE             |
| PARK SANG SEUK  | PARKSANGSEUK INTERNAL MEDICINE       |
| KIM NAM DONG    | KIMNAMDONG IM                        |
| HONG WOOK KYUN  | HONG INTERNAL MEDICINE               |
| KIM ILHOE       | KIMILHOE IM                          |
| YOON GUMSUK     | YOON INTERNAL MEDICINE               |
| LEE MYUNG HO    | LEEMYUNGHO INTERNAL MEDICINE         |
| SHIM SANG BUM   | SHIM INTERNAL MEDICINE               |
| TAK SANG MIN    | TAK INTERNAL MEDICINE                |
| LEE OK CHAN     | LEEOKCHAN INTERNAL MEDICINE          |
| HONG SUNG HOON  | HONGSUNGHOOON INTERNAL MEDICINE      |
| JUNG EUY HUN    | HALLYM INTERNAL MEDICINE             |
| LIM JUNG KUN    | LIMJUNGKUN INTERNAL MEDICINE         |
| KIM HYOUNG JUN  | KIM IM                               |
| KIM BYOUNG RYUL | KIMBYOUNGRYUL IM                     |
| HONG SANG IN    | HONG INTERNAL MEDICINE               |
| JUN CHANG HO    | MI INTERNAL MEDICINE                 |
| LEE JAE SUN     | LEEJAESUN INTERNAL MEDICINE          |
| JUNG PHIL HO    | JUNG INTERNAL MEDICINE               |
| KANG NAMYOUNG   | KANGNAMYOUNG INTERNAL MEDICINE       |
| LEE HYOUNG JUN  | LEEHYOUNGJUN INTERNAL MEDICINE       |
| SONG KWANG SUN  | SONGKWANGSUN INTERNAL MEDICINE       |
| MIN MI SIM      | YONSEI MIN INTERNAL MEDICINE         |
| LEE SU IN       | BEST INTERNAL MEDICINE               |
| JUNG SIN HONG   | YONSEI INTERNAL MEDICINE             |
| CHOI WON WOOK   | PUREUN INTERNAL MEDICINE             |
| HEO HONGGEUN    | HEO INTERNAL MEDICINE                |

|                  |                                                 |
|------------------|-------------------------------------------------|
| KWON JAEKOO      | KWON INTERNAL MEDICINE                          |
| CHUNG HYUN KU    | BEAK'S INTERNAL MEDICAL CLINIC                  |
| KIM DUK KI       | KIM MEDICAL CLINIC                              |
| YOO JAI GYUK     | YOO INTERNAL MEDICINE                           |
| LEE SUNG JUN     | LEE SUNG JUN INTERNAL MEDICINE                  |
| YI JONG DAE      | JONG-DAE YI INTERNAL MEDICINE CLINIC            |
| LEE JONG CHAN    | WENJANG INTERNAL MEDICINE                       |
| SONG MIN SOO     | JEIL JOEN INTERNAL MEDICINE                     |
| LEE NAM MIN      | LEE NAM MIN INTERNAL MEDICINE                   |
| LEE HOON         | SEVERANCE INTERNAL MEDICINE                     |
| KIM TAE JOON     | KIMTAEJOON IM CLINIC                            |
| KIM SEONG JIN    | KIM SEONG JIN INTERNAL MEDICINE                 |
| KIM CHEOL WOO    | KIMCHEOLWOO IM                                  |
| JEON IL MOON     | JEON IL MOON INTERNAL MEDICINE                  |
| LEE NAK WEON     | LEE NAK WEON INTERNAL MEDICINE                  |
| HYEON YOUNG KEUN | HYEON YOUNG KEUN INTERNAL MEDICINE              |
| PARK HYOENG SEOK | PARK HYOENG SEOK INTERNAL MEDICINE              |
| KIM KEUN WHA     | KEUN WHA INTERNAL MEDICINE                      |
| KIM MYUNG HOON   | SAM SUNG HAENGBOKHAN INTERNAL MEDICINE          |
| KANG JUNG HYUN   | YONGOON INTERNAL MEDICINE                       |
| KIM SAHNG SEOP   | GORYEO INTERNAL MEDICINE                        |
| KIM SEUNG TAE    | KIM SEUNG TAE IM                                |
| KWAK SEUNG KEUN  | HAENGBOKHAN INTERNAL MEDICINE                   |
| PARK GI HYUN     | ALL-LIVE INTERNAL MEDICINE                      |
| JANG JOON        | HANARO MEDICAL CLINIC                           |
| SONG IN KWAN     | SUNGMO INTERNAL MEDICAL CLINIC                  |
| CHOI IL HOON     | SAESEOUL INTERNAL MEDICINE                      |
| JANG WON IL      | KOSMO INTERNAL MEDICINE                         |
| OH BYUNG NAM     | OH INTERNAL MEDICINE                            |
| KIM JONG HANK    | KIM JONG-HAK IM                                 |
| CHIN YONG JOO    | DOON SAN SOK PYEON HAN INTERNAL MEDICINE CLINIC |
| SEO IN SEOK      | HANG LIM INTERNAL MEDICINE CLINIC               |
| LEE NARANHI      | LEADERS & INTERNAL MEDICINE CLINIC              |
| KIM HOON SIK     | JOONG ANG INTERNAL MEDICINE                     |
| UH HO YONG       | EXPO INTERNAL MEDICINE                          |
| JE-WOONG MOON    | NO-EUN INTERNAL MEDICINE                        |
| KIM CHEOL WOO    | KIM CHEOL WOO INTERNAL MEDICINE                 |
| LEE BONG SU      | SOKPYUNHAN INTERNAL MEDICINE                    |
| NOH EUN JOONG    | KOREA ASSOCIATION OF HEALTH PROMOTION           |
| LEE SUNG HOON    | CITY INTERNAL MEDICINE                          |
| JUNG JOON YONG   | BAESARANG INTERNAL MEDICINE                     |
| PARK KUK TAE     | SUNSA INTERNAL MEDICINE                         |
| JANG BYUNGWHAN   | DUNSAN INTERNAL MEDICINE                        |
| JUNG GOOHYUK     | BOKEUM INTERNAL MEDICINE                        |
| LEE YOUNG KYU    | JAMYUNG INTERNAL MEDICINE                       |
| HAN YOON CHANG   | HANYOONCHANG INTERNAL MEDICINE                  |
| OH KWANG SICK    | CHAMJOUN INTERNAL MEDICINE                      |
| BAE IL HOON      | BAE IL HOON INTERNAL MEDICINE                   |
| PARK SUNG SOON   | GOOD MORNING INTERNAL MEDICINE                  |

|                  |                                           |
|------------------|-------------------------------------------|
| JO JUN HYUNG     | JO JUN HYUNG INTERNAL MEDICINE            |
| JEON HA YUNG     | JEON INTERNAL MEDICINE CLINIC             |
| CHOI NAK HYUN    | CHOI INTERNAL MEDICINE CLINIC             |
| LEE JAE SOO      | LEE JAESOO INTERNAL MEDICINE CLINIC       |
| OH SE JIN        | OH SEJIN INTERNAL MEDICINE CLINIC         |
| JEONG JIN YOUNG  | JEONG JINYOUNG INTERNAL MEDICINE CLINIC   |
| YOO IL YOUNG     | SOK PYUNHAN INTERNAL MEDICINE CLINIC      |
| OH MEE HEE       | DR OH'S INTERNAL MEDICINE                 |
| LEE WON DON      | DR LEE'S INTERNAL MEDICINE                |
| YOON HO BAE      | DR YOON INTERNAL MEDICINE                 |
| KIM HYOUNG SAM   | SOKPLUS INTERNAL MEDICINE                 |
| OH JEONG JIN     | OH JEONGJIN INTERNAL MEDICINE CLINIC      |
| KIM GI SEON      | KIM INTERNAL MEDICINE CLINIC              |
| JUNG YOUN MU     | DR JEONG INTERNAL MEDICINE                |
| KIM SEON TEK     | KOKKIRI INTERNAL MEDICINE CLINIC          |
| YANG CHANG HO    | YANG CHANG HO INTERNAL MEDICINE CLINIC    |
| KOO BON SAM      | KOO BON SAM INTERNAL MEDICINE CLINIC      |
| CHOI WON RAK     | CHOI WON RAK INTERNAL MEDICINE CLINIC     |
| LEE KYUNG HO     | LEE KYUNG HO INTERNAL MEDICINE CLINIC     |
| YANG YUN CHUL    | BUSAN INTERNAL MEDICINE CLINIC            |
| JEON TAE HEE     | HA HOSPITAL                               |
| PARK JONG NAM    | PARK JONG NAM INTERNAL MEDICINE CLINIC    |
| SHIM YOUNG WOONG | SHIM YOUNG WOONG INTERNAL MEDICINE CLINIC |
| JO SIM HYEON     | JO SIM HYEON INTERNAL MEDICINE CLINIC     |
| KWON JONG SOO    | KWON JONG SOO INTERNAL MEDICINE CLINIC    |
| KIM YONG JOON    | KIM YONG JOON INTERNAL MEDICINE CLINIC    |
| KIM YOUNG        | KIM YOUNG INTERNAL MEDICINE CLINIC        |
| LEE SEONG GEUN   | YONSEI INTERNAL MEDICINE CLINIC           |
| KIM TAE JIN      | KIM TAE JIN INTERNAL MEDICINE CLINIC      |
| LEE SEONG DONG   | LEE SUNG DONG INTERNAL MEDICINE CLINIC    |
| PARK JAE SEOK    | PARK JAE SEOK INTERNAL MEDICINE CLINIC    |
| JEONG HAN HO     | JEONG HAN HO I.M                          |
| KIM HAN SEONG    | HWA MYEONG INTERNAL MEDICINE CLINIC       |
| CHOI TAE RYONG   | CHOI TAE RYONG INTERNAL MEDICINE CLINIC   |
| KIM JIN GYU      | KIM JIN GYU I.M                           |
| LEE GANG RYONG   | LEE GANG RYONG I.M                        |
| KIM SUNG HU      | KIM SUNG HU INTERNAL MEDICINE CLINIC      |
| JEONG MOON HO    | JEONG MOON HO I.M                         |
| SEO BO WON       | SEO BO WON INTERNAL MEDICINE CLINIC       |
| LEE GYUN TAE     | LEE GYUN TAE I.M                          |
| LEE JU HONG      | LEE JU HONG INTERNAL MEDICINE CLINIC      |
| JANG DO HYEON    | JANGPYEONHAN CLINIC OF INTERNAL MEDICINE  |
| JOO NAM YOUNG    | JEIL INTERNAL MEDICINE FAMILY CLINIC      |
| MOON SUNG BAE    | MOON SUNG BAE INTERNAL MEDICINE CLINIC    |
| RYU JONG CHUL    | BUSAN YONHAP INTERNAL MEDICINE            |
| KIM UL SOO       | YONSAN INTERNAL MEDICINE                  |
| KIM SIN          | PRIME HOSPITAL                            |
| JUNG JAE SUNG    | SIWONHAN INTERNAL MEDICINE                |
| KIM MIN KI       | FU RUN I.M                                |

|                  |                                          |
|------------------|------------------------------------------|
| PARK JUNG HYEON  | BIG MEDI I.M                             |
| LEE MU YEOL      | JO I.M                                   |
| HONG SU HEE      | BEAUTIFUL GANG-SAN HOSPITAL              |
| PARK HUI RYEONG  | PARK HUI RYEONG I.M                      |
| JANG YONG WOO    | BARUN.GIL HOSPITAL                       |
| CHOI SEONG CHEOL | CHOI SEONG CHEOL I.M                     |
| WOO SANG JUN     | WOO I.M                                  |
| PARK WON DAE     | PARK WON DAE I.M                         |
| JUNG IN GWON     | NEWMORING-YONHAP I.M                     |
| HWANG DU HWAN    | HWANG DU HWAN I.M                        |
| KIM CHOON SUB    | KIM CHOON SUB IM                         |
| LEE KANG CHUL    | LEE KANG CHUL INTERNAL MEDICINE          |
| LEE SEONG HUI    | LEE SEONG HUI I.M                        |
| KIM BOK GEUN     | KIM BOK GEUN I.M                         |
| KANG MUN SU      | KANG MUN SU I.M                          |
| LIM DEA GUN      | LIM INTERNAL MEDICINE                    |
| JEONG BYEONG O   | JEONG BYEONG O I.M                       |
| PARK JUNG KUK    | PARK JUNG KUK INTERNAL MEDICINE          |
| CHO HO SIK       | CHO HO SIK INTERNAL MEDICINE             |
| KIM JI HEE       | KIM JI HEE INTERNAL MEDICINE             |
| KIM MOO WON      | KIM MOO WON INTERNAL MEDICINE            |
| KO YOUNG HEE     | KO YOUNG HEE INTERNAL MEDICINE           |
| HEO HYUNG HO     | HEO HYUNG HO INTERNAL MEDICINE           |
| LEE JAE JUN      | LEE JAE JUN INTERNAL MEDICINE            |
| LEE DONG WOOK    | DAE PYEONG RI INTERNAL MEDICINE CLINIC   |
| LEE BYUNG SOO    | LEE BYUNG SOO INTERNAL MEDICINE          |
| HAN MYUNG JA     | DR. HAN'S INTERNAL MEDICINE              |
| YEO DONG KEUN    | WON DAE MEDICAL CLINIC                   |
| HWANG HYUNG KI   | HWANG HYUNG KI INTERNAL MEDICINE         |
| YUN HYE JUNG     | YUN HYE JUNG INTERNAL MEDICINE           |
| PARK JIN HO      | PARK JIN HO INTERNAL MEDICINE            |
| JUNG JI IN       | SEO DAE GU INTERNAL MEDICINE             |
| PARK KI SOO      | PARK KI SOO INTERNAL MEDICINE            |
| JUNG GYU YOUNG   | HANMAUM INTERNAL MEDICINE CLINIC         |
| HAN JUNG HUN     | DR HAN'S INTERNAL MEDICINE CLINIC        |
| BAE YONG HAK     | SEMIN INTERNAL MEDICINE CLINIC           |
| PARK MI YOUNG    | SAMSUNG INTERNAL MEDICINE CLINIC         |
| PAEK MI YOUNG    | DOOSAN INTERNAL MEDICINE CLINIC          |
| LEE SOON HAK     | JISAN SOKSIWON INTERNAL MEDICINE CLINIC  |
| KIM JAE SUK      | JAIL INTERNAL MEDICINE CLINIC            |
| LEE SANG YUB     | LEE SANG YUB INTERNAL MEDICINE CLINIC    |
| CHOI JOON        | CHOI JOON INTERNAL MEDICINE CLINIC       |
| CHO BONG GI      | HYUNDAI INTERNAL MEDICINE CLINIC         |
| LEE GU           | HYO SEONG MEDICINE CLINIC                |
| LEE HO YOUNG     | FATIMA INTERNAL MEDICINE CLINIC          |
| LEE HAN GYUN     | DONG HO INTERNAL MEDICINE CLINIC         |
| GU SEONG MO      | GU SEONG MO INTERNAL MEDICINE CLINIC     |
| BAEK HYO JONG    | BAEK HYO JONG INTERNAL MEDICINE CLINIC   |
| KIM BYEONG HOON  | KIM BYEONG HOON INTERNAL MEDICINE CLINIC |

|                   |                                          |
|-------------------|------------------------------------------|
| JEON SEOK GU      | JEON SEOK GU INTERNAL MEDICINE CLINIC    |
| CHOI HEE MAN      | BOK HYUNG INTERNAL MEDICINE CLINIC       |
| KIM JANG WON      | JANG WON INTERNAL MEDICINE CLINIC        |
| PARK JONG HYEOK   | DR PARK'S INTERNAL MEDICINE CLINIC       |
| LEE JONG HYEON    | LEE JONG HYEON INTERNAL MEDICINE CLINIC  |
| JUNG YUN HYEONG   | JEIL INTERNAL MEDICINE CLINIC            |
| PARK SI HWA       | PARK SI HWA INTERNAL MEDICINE CLINIC     |
| LEE KWAN HYUNG    | HYUNDAI UNION INTERNAL MEDICINE          |
| PARK YONG HO      | JE IL INTERNAL MEDICINE                  |
| LEE HYUNG CHEOL   | SEON SAN JE-IL HOSPITAL                  |
| KIM TAK KAWN      | KIM TAK KAWN INTERNAL MEDICINE           |
| CHOE CHUNG GYEONG | CHO & PARK INTERNAL MEDICINE             |
| SEOK JUN HO       | SUK JUN HO INTERNAL MEDICINE             |
| LEE YONG WON      | LEE YONG WON INTERNAL MEDICINE           |
| SEO YEONG BAE     | SEO YEONG BAE KANG SIM INTERNAL MEDICINE |
| PARK SEONG JIN    | HAN MIN INTERNAL MEDICINE                |
| KIM HAK GEUN      | JUNG ANG INTERNAL MEDICINE               |
| LEE HONG WOO      | SEOUL INTERNAL MEDICINE                  |
| PARK KYUNG DAE    | PARK KYUNG DAE INTERNAL MEDICINE         |
| CHOI KYUNG RYEOL  | DR.CHOI'S INTERNAL MEDICINE CLINIC       |
| KWON KYU DON      | KWON & OH UNION INTERNAL MEDICINE        |
| LEE DONG JUN      | LEE DONG JUN INTERNAL MEDICINE CLINIC    |
| YUN EUNG SAM      | DR.YUN'S INTERNAL MEDICINE CLINIC        |
| SIN YOUNG HO      | SIN YOUNG HO INTERNAL MEDICINE CLINIC    |
| JUNG TAE HO       | DR. JUNG'S INTERNAL MEDICINE CLINIC      |
| LEE SOO CHANG     | DR. LEE'S INTERNAL MEDICAL CLINIC        |
| KIM IN KEE        | DR. KIM'S INTERNAL MEDICINE CLINIC       |
| YOON SANG MYUNG   | GREEN INTERNAL MEDICINE CLINIC           |
| KIN KI HWAN       | SOK - SI - WON INTERNAL MEDICINE CLINIC  |
| YOUNG CHAE JUNG   | DR. JUNG'S INTERNAL MEDICINE CLINIC      |
| LYOU JUNE HYUNG   | DR. YOU'S MEDICAL CLINIC                 |
| BOO KYUNG LEE     | DR. LEE'S MEDICAL CLINIC                 |
| OH YONG KU        | DR. OH'S INTERNAL MEDICINE CLINIC        |
| RYU SEUNG HWAN    | DR. RYU'S MEDICAL CLINIC                 |
| KIM MYEONG HEE    | MYEONG INTERNAL MEDICINE CLINIC          |
| PYO KWANG MIN     | DR. PYO'S INTERNAL MEDICINE CLINIC       |
| SEO JEONG CHEOL   | DR. SEO'S MEDICAL CLINIC                 |
| PAIK TAE HYUN     | MIRAE MEDICAL CLINIC                     |
| NOH CHI WAN       | BOG EUM INTERNAL MEDICINE CLINIC         |
| LEE GANG WAN      | HADONG JUNGANG INTERNAL MEDICINE CLINIC  |
| JUNG GYEONG WON   | HAN GUK INTERNAL MEDICINE CLINIC         |
| JANG SE JUN       | DR. JANG'S INTERNAL MEDICINE CLINIC      |
| OH GI CHANG       | CHAMSARANG YEONHAP CLINIC                |
| PAIK KYUNG KWON   | SEOUL MEDICAL CLINIC                     |
| LEE SANG SU       | SOK-SIMDANG INTERNAL MEDICINE CLINIC     |
| KIM WON SHICK     | SAMCHUNPO CLINIC OF INTERNAL MEDICINE    |
| CHOI HAENG JIN    | DR. CHOI'S INTERNAL MEDICINE CLINIC      |
| LEE YOU PAN       | DR. LEE&CHO'S INTERNAL MEDICINE CLINIC   |
| KIM SUNG UK       | YUK MEDICAL CLINIC                       |

|                  |                                         |
|------------------|-----------------------------------------|
| YANG SANG HO     | DR. YANG'S INTERNAL MEDICINE CLINIC     |
| OH YOUNG JAE     | SEOUL NEURO - INTERNAL MEDICINE CLINIC  |
| JUNG KI MOON     | DR. JUNG'S INTERNAL MEDICINE CLINIC     |
| KIM HUUN SOO     | DUK - YOUNG INTERNAL MEDICINE CLINIC    |
| KIM WON MIN      | KIM WON MIN INTERNAL MEDICINE           |
| PARK IL JONG     | PARK IL JONG INTERNAL MEDICINE          |
| LIM TAE JIN      | LIM TAE JIN INTERNAL MEDICINE           |
| PARK CHANG HYEON | PARK CHANG HYEON INTERNAL MEDICINE      |
| SHIN EUN TEAK    | HANSARANG INTERNAL MEDICINE CLINIC      |
| MO SEONG HWAN    | MO SEONG HWAN INTERNAL MEDICINE CLINIC  |
| LEE JUNG HUN     | LEE JUNG HUN INTERNAL MEDICINE CLINIC   |
| JUNG HAK MIN     | JUNG HAKMIN INTERNAL MEDICINE CLINIC    |
| SEO BYEONG KI    | SEO BYEONG KI INTERNAL MEDICINE CLINIC  |
| JEONG YUN GU     | JEONG YUN GU INTERNAL MEDICINE CLINIC   |
| KIM JIN SEOK     | SO MANG INTERNAL MEDICINE CLINIC        |
| KIM TAE WEON     | KIM TAEWEON INTERNAL MEDICINE CLINIC    |
| YUN HYEONG SIN   | DREAM INTERNAL MEDICINE CLINIC          |
| SEO JONG OG      | DR. SEO'S INTERNAL MEDICINE CLINIC      |
| LEE SUNG HYUN    | BOKUM INTERNAL MEDICINE CLINIC          |
| KIM KI YOUNG     | KIM KIYOUNG INTERNAL MEDICINE CLINIC    |
| KANG CHEOL MIN   | KANG CHEOL MIN INTERNAL MEDICINE CLINIC |
| WOO YONG AN      | MODUPYEONHAN INTERNAL MEDICINE CLINIC   |
| JUNG BYEONG GON  | WOO RI INTERNAL MEDICINE CLINIC         |
| YUN SANG JUN     | YUN SANGJUN INTERNAL MEDICINE CLINIC    |
| LIM SEUNG CHAN   | BOEK EM INTERNAL MEDICINE               |
| LEE CHANG SOO    | LEE CHANG SOO INTERNAL MEDICINE         |
| YUN GYEONG HWAN  | YUN GYEONG HWAN INTERNAL MEDICINE       |
| KIM KYUNG HO     | KIM KYUNG-HO INTERNAL MEDICINE          |
| YEOM GWANG RYEOL | YEOM GWANG RYEOL INTERNAL MEDICINE      |
| YU SUNG SIK      | SANG MU U RI INTERNAL MEDICINE          |
| KIM JONG DU      | KIM JONG DU INTERNAL MEDICINE           |
| SIN SUN CHEOL    | MEDIPHIL LINTERNAL MEDICINE             |
| LEE GI JOO       | LEE INTERNAL MEDICINE                   |
| SONG CHANG HUN   | SONG, CHANG HUN INTERNAL MEDICINE       |
| KOH SEUNG SEOK   | ADVENTIST INTERNAL MEDICINE             |
| CHO JUNG KON     | CHO, JUNG KON INTERNAL MEDICINE         |
| YANG DAI HYUN    | YANG DAI HYUN INTERNAL MEDICINE         |
| KIM HYUNG WON    | KIM HYUNG WON INTERNAL MEDICINE         |
| LIM WON SEOP     | LIM WON SEOP INTERNAL MEDICINE          |
| GILL GWANG CHAE  | GILL GWANG CHAE INTERNAL MEDICINE       |
| YANG SEUNG HO    | HANSOL INTERNAL MEDICINE CLINIC         |
| KI JANG DO       | KI JANGDO INTERNAL MEDICINE CLINIC      |
| KIM SANG DO      | KIM SANGDO INTERNAL MEDICINE CLINIC     |
| LEE SANG HYUK    | LEE INTERNAL MEDICINE CLINIC            |
| HAN JEONG YEOL   | HAN JEONGYEOL INTERNAL MEDICINE CLINIC  |
| YANG JU YEOL     | MED YANG'S INTERNAL MEDICINE CLINIC     |
| PARK KWANG GI    | PARK KWANGGI INTERNAL MEDICINE CLINIC   |
| CHOI BYUNG GI    | YONSEI INTERNAL MEDICINE CLINIC         |
| YU KYUNG HWAN    | YON SEI INTERNAL MEDICINE               |

|                  |                                         |
|------------------|-----------------------------------------|
| KIM MUN JUNG     | KIM MUNG JUNG INTERNAL MEDICINE         |
| CHOI SANG IN     | CHOI SANG IN INTERNAL MEDICINE          |
| CHOI EUN YOUNG   | CHOI EUN YOUNG INTERNAL MEDICINE        |
| KIM JONG GU      | KIM JONG GU INTERNAL MEDICINE CLINIC    |
| JEON JONG IL     | JEON JONG IL INTERNAL MEDICINE CLINIC   |
| JANG MYUNG GYU   | JANG MYUNG GYU INTERNAL MEDICINE CLINIC |
| SONG HO SIN      | SONG HO SIN INTERNAL MEDICINE CLINIC    |
| CHOI YO AN       | CHOI YO AN INTERNAL MEDICINE CLINIC     |
| JANG HEE SUNG    | JANG HEE SUNG INTERNAL MEDICINE CLINIC  |
| KIM CHANG HUN    | KIM CHANG HUN INTERNAL MEDICINE CLINIC  |
| YU WUN YONG      | YU WUN YONG INTERNAL MEDICINE CLINIC    |
| LEE CHONG IK     | DR LEE'S MEDICAL CLINIC                 |
| HA JONG YOUNG    | HA JONG YOUNG INTERNAL MEDICINE         |
| KIM SUNG KOOK    | KIM SUNG KOOK INTERNAL MEDICINE         |
| RYU KWANG HYUN   | RYU INTERNAL MEDICINE                   |
| LEE GANG WON     | LEE GANG WON INTERNAL MEDICINE          |
| KIM YUN SEOK     | BUAN INTERNAL MEDICINE                  |
| LEE SANG BO      | SEOUL SAMSUNGHOSPITAL                   |
| KIM HYUN JUNG    | KIM HYUN JUNG INTERNAL MEDICINE         |
| LEE IL SOO       | GS SOK INTERNAL MEDICINE                |
| LEE SANG CHUL    | LEE SANG CHUL INTERNAL MEDICINE         |
| JI HYUN KYU      | JI HYUN KYU INTERNAL MEDICINE           |
| HYUNG GEUN YOUNG | HYUNG GEUN YOUNG INTERNAL MEDICINE      |
| JIN SEING HO     | JIN SEING HO INTERNAL MEDICINE          |
| KIM JIN HONG     | KIM JIN HONG INTERNAL MEDICINE          |
| PARK SANG BAE    | PARK SANG BAE INTERNAL MEDICINE         |
| LEE JAE HYUN     | LEE JAE HYUN INTERNAL MEDICINE          |
| LEE EUN HAK      | LEE EUN HAK INTERNAL MEDICINE           |
| JEONG JAE HEE    | DR.JEONG'S INTERNAL MEDICINE            |
| JO KANGIL        | SOCKPYEONAN I.M.                        |
| BANG IN SUK      | MYENG IN INTERNAL MEDICINE              |
| LEE KWON HO      | SEOGWIPO INTERNAL MEDICINE              |
| KIM WON TSEN     | SEVERANCE INTERNAL MEDICINE             |
| LEE GEON         | LEE GEON INTERNAL MEDICINE CLINIC       |
| YU HYO MIN       | YU HYO MIN INTERNAL MEDICINE CLINIC     |
| KIM BYEONG HOON  | HAPPY INTERNAL MEDICAL CLINIC           |
| EUN YEON GEE     | EUN YEON GEE MEDICAL CLINIC             |
| CHEON HO KEE     | DR. CHEON INTERNAL MEDICINE             |
| PARK TAE WOON    | GUNGANGDREAM MEDICAL CLINIC             |
| KIM JOONG YOUNG  | YONSEI INTERNAL MEDICINE                |
| HONG EUN JUNG    | HONGEUNJUNG INTERNAL MEDICINE           |
| LEE YOUNG WOO    | LEE YOUNG WOO INTERNAL MEDICINE         |
| LEE SEOK JU      | LEE'S INTERNAL MEDICINE CLINIC          |
| CHOI YONG HO     | 123 INTERNAL MEDICINE                   |
| SONG JAE SOON    | HANGIL INTERNAL MEDICINE                |
| BANG DO SEOK     | BANG DO SEOK INTERNAL MEDICINE          |
| KIM PILL YOUNG   | KIM PILL YOUNG INTERNAL MEDICINE        |
| HWANG BYUNG WOOK | DR.HWANG'S INTERNAL MEDICINE            |
| KOO JUNG WAN     | KOO JUNG WAN INTERNAL MEDICINE          |

|                 |                                           |
|-----------------|-------------------------------------------|
| SUH EUI SOO     | SUH INTERNAL MEDICINE CLINIC              |
| LEE JOO HYUNG   | CHANGWON YEONHAP INTERNAL MEDICINE CLINIC |
| LEE JIN UNG     | LEE JIN UNG INTERNAL MEDICINE             |
| JIN HEON SEONG  | JIN INTERNAL MEDICINE                     |
| LEE SOON HYUNG  | LEE SOON HYUNG INTERNAL MEDICINE          |
| LEE YOUNG SEUNG | LEE YOUNG SEUNG INTERNAL MEDICINE         |
| LEE DUK SOO     | LEE DUK SOO INTERNAL MEDICINE             |
| LEE SANG MIN    | MEDI-HEART INTERNAL MEDININE CLINIC       |
